# Supplementary material
Source: Springer Nature journal article supplement (https://www.springerprofessional.de/resource/supplementary/40294_2012_8_MOESM4_ESM.pdf/11899552)

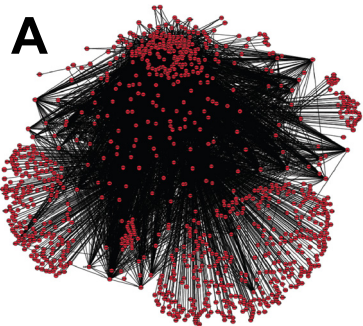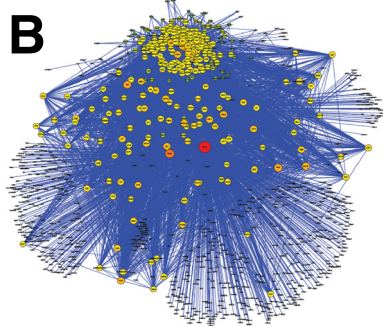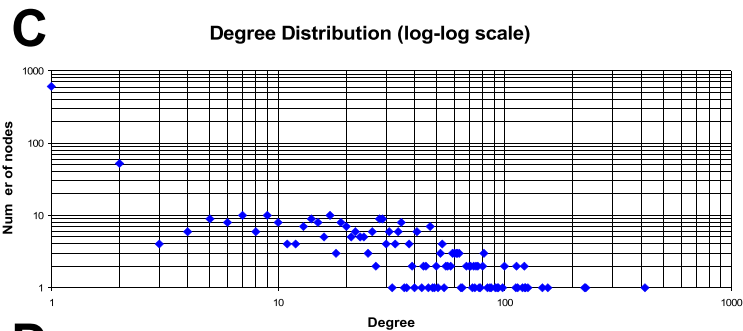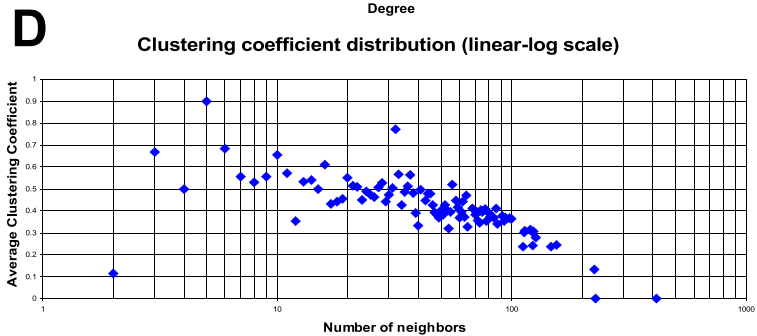

Supplement: MOESM4 [file 11899552]
